# Supplementary material for: Using Artificial Neural Network (ANN) for Short-Range Prediction of Cotton Yield in Data-Scarce Regions
Source: MDPI journal article supplement (doi:10.3390/agronomy12040828), 2022-03-29
Supplement: s1 [file s1]

## **Using Artificial Neural Network (ANN) for Short-range Prediction of Cotton Yield in Data-scarce Regions**

### **SUPPLEMENTARY MATERIAL**

The Supplemental Material provides information that describes the number of Landsat images used for each month, and the dataset size (13 vs. 6-yrs) and 6-year climate scenarios investigated in this study. Table S1 – numbers of Landsat 7 ETM images for each month, The rest of the information consists of years contained in each scenarios and their corresponding annual precipitation amounts summarized in 6 tables that include: Table S2 - 13 years baseline scenario (BSL), Table S3 - ppredominantly dry climate scenarios (DS), Table S4 – predominantly wet climate scenarios (WS), Table S5 – predominantly average climate scenarios (AS), and Table S6 - variable climate scenarios (VS). Annual precipitation is used to classify climate scenario categories based on long-term (35 years) average precipitation 575 mm for Menemen region in Turkey. Annual precipitation amounts less than 490 mm were considered dry, between 490 and 660 mm were considered average, and greater than 660 mm were considered wet.

Table S1. The numbers of Landsat 7 ETM images for each month

|      | <b>April</b> | <b>May</b> | <b>June</b> | <b>July</b> | <b>August</b> |
|------|--------------|------------|-------------|-------------|---------------|
| 2006 | 2            | 2          | 4           | 1           | 3             |
| 2007 | 3            | 1          | 1           | 2           | 4             |
| 2008 | 1            | 2          | 2           | 3           | 2             |
| 2009 | 1            | 3          | 1           | 4           | 3             |
| 2010 | 2            | 2          | 2           | 3           | 3             |
| 2011 | 1            | 3          | 3           | 2           | 4             |
| 2012 | 2            | 2          | 3           | 2           | -             |
| 2013 | 1            | 3          | 3           | 4           | 2             |
| 2014 | 2            | 4          | 4           | 3           | 4             |
| 2015 | 2            | 1          | 2           | 3           | 2             |
| 2016 | 2            | 1          | 2           | 4           | 4             |
| 2017 | 3            | 3          | 3           | 4           | 4             |
| 2018 | 2            | 3          | 4           | 4           | 4             |

Table S2. Baseline scenario (BSL) consisting of 13 years with corresponding annual precipitation (P)

| <b>13- Year Baseline Scenario (BSL)</b> |               |
|-----------------------------------------|---------------|
| <b>Year</b>                             | <b>P (mm)</b> |
| 2006                                    | 311           |
| 2007                                    | 245           |
| 2008                                    | 305           |
| 2009                                    | 752           |
| 2010                                    | 823           |
| 2011                                    | 550           |
| 2012                                    | 550           |
| 2013                                    | 730           |
| 2014                                    | 522           |
| 2015                                    | 668           |
| 2016                                    | 489           |
| 2017                                    | 645           |
| 2018                                    | 601           |

Table S3. Predominantly 6-year dry climate scenarios (DS) with corresponding annual precipitation (P)

| 6-Year Predominantly Dry Scenarios (DS) |           |      |           |      |           |      |           |      |           |      |           |      |           |      |           |
|-----------------------------------------|-----------|------|-----------|------|-----------|------|-----------|------|-----------|------|-----------|------|-----------|------|-----------|
| DS1                                     |           | DS2  |           | DS3  |           | DS4  |           | DS5  |           | DS6  |           | DS7  |           | DS8  |           |
| Year                                    | P<br>(mm) | Year | P<br>(mm) | Year | P<br>(mm) | Year | P<br>(mm) | Year | P<br>(mm) | Year | P<br>(mm) | Year | P<br>(mm) | Year | P<br>(mm) |
| 2007                                    | 245       | 2007 | 245       | 2007 | 245.2     | 2007 | 245       | 2007 | 245       | 2007 | 245       | 2007 | 245       | 2007 | 245       |
| 2008                                    | 305       | 2008 | 305       | 2008 | 305.4     | 2008 | 305       | 2008 | 305       | 2008 | 305       | 2008 | 305       | 2008 | 305       |
| 2006                                    | 311       | 2006 | 311       | 2006 | 311.4     | 2006 | 311       | 2006 | 311       | 2006 | 311       | 2006 | 311       | 2006 | 311       |
| 2016                                    | 489       | 2016 | 489       | 2016 | 489.2     | 2016 | 489       | 2016 | 489       | 2016 | 489       | 2016 | 489       | 2016 | 489       |
| 2014                                    | 522       | 2014 | 522       | 2014 | 521.6     | 2014 | 522       | 2014 | 522       | 2014 | 522       | 2014 | 522       | 2014 | 522       |
| 2012                                    | 550       | 2011 | 550       | 2018 | 601.2     | 2017 | 645       | 2015 | 668       | 2013 | 730       | 2009 | 752       | 2010 | 823       |

Table S4. Predominantly 6-year wet climate scenarios (WS) with corresponding annual precipitation (P)

[illegible]

Table S5. Predominantly 6-year average climate scenarios (AS) with corresponding annual precipitation (P)

| 6-Year Predominantly Average Scenarios (AS) |           |      |           |      |           |      |           |      |           |      |           |      |           |      |           |
|---------------------------------------------|-----------|------|-----------|------|-----------|------|-----------|------|-----------|------|-----------|------|-----------|------|-----------|
| AS1                                         |           | AS2  |           | AS3  |           | AS4  |           | AS5  |           | AS6  |           | AS7  |           | AS8  |           |
| Year                                        | P<br>(mm) | Year | P<br>(mm) | Year | P<br>(mm) | Year | P<br>(mm) | Year | P<br>(mm) | Year | P<br>(mm) | Year | P<br>(mm) | Year | P<br>(mm) |
| 2007                                        | 245       | 2008 | 305       | 2006 | 311       | 2016 | 489       | 2014 | 522       | 2014 | 522       | 2014 | 522       | 2014 | 522       |
| 2014                                        | 522       | 2014 | 522       | 2014 | 522       | 2014 | 522       | 2012 | 550       | 2012 | 550       | 2012 | 550       | 2012 | 550       |
| 2012                                        | 550       | 2012 | 550       | 2012 | 550       | 2012 | 550       | 2011 | 550       | 2011 | 550       | 2011 | 550       | 2011 | 550       |
| 2011                                        | 550       | 2011 | 550       | 2011 | 550       | 2011 | 550       | 2018 | 601       | 2018 | 601       | 2018 | 601       | 2018 | 601       |
| 2018                                        | 601       | 2018 | 601       | 2018 | 601       | 2018 | 601       | 2017 | 645       | 2017 | 645       | 2017 | 645       | 2017 | 645       |
| 2017                                        | 645       | 2017 | 645       | 2017 | 645       | 2017 | 645       | 2015 | 668       | 2013 | 730       | 2009 | 752       | 2010 | 823       |

Table S6. Variable climate scenarios (VS) with corresponding annual precipitation (P)

| <b>6-Year Variable Scenarios (VS)</b> |               |             |               |
|---------------------------------------|---------------|-------------|---------------|
| <b>VS1</b>                            |               | <b>VS2</b>  |               |
| <b>Year</b>                           | <b>P (mm)</b> | <b>Year</b> | <b>P (mm)</b> |
| 2007                                  | 245           | 2006        | 311           |
| 2008                                  | 305           | 2016        | 489           |
| 2011                                  | 550           | 2011        | 550           |
| 2018                                  | 601           | 2018        | 601           |
| 2009                                  | 752           | 2015        | 668           |
| 2010                                  | 823           | 2013        | 730           |
